# Supplementary material for: Recyclable hydrotalcite catalysts for alcohol imination via acceptorless dehydrogenation
Source: Royal Society of Chemistry journal article supplement (doi:10.1039/c5gc00312a), 2015-01-01
Supplement: c5gc00312a1.pdf [file c5gc00312a1.pdf]

# Supporting Information for

## Recyclable hydrotalcite catalysts for alcohol imination via acceptorless dehydrogenation

John Bain, Philip Cho, and Adelina Voutchkova-Kostal

Department of Chemistry, The George Washington University, Washington, DC 20052

Corresponding Author:

Adelina Voutchkova-Kostal. Tel.: 202-994-6121, Fax: 202-994-5873,

Email: [avoutchkova@email.gwu.edu](mailto:avoutchkova@email.gwu.edu)

### Table of Contents

**SI-Experimental.** Preparation of Mg: Al HT 3:1 and 15% M<sup>x</sup> doped Mg:Al Hydrotalcite

**Table S1.** Reports of hydrotalcite-like materials and their structural properties

**Figure S1.** PXRD patterns of HT**1-6**

**Figure S2.** FT-IR spectra of HT**1-6**

**Figure S3.** STEM image of Pd/HT**1** with EDX of the region indicated with red circle

**Figure S4.** PXRD patterns of HT**4** after subsequent catalytic cycles

**Figure S5.** FT-IR spectra of HT**4** after subsequent catalytic cycles

**SI- <sup>1</sup>H NMR data.** Imines from substrate scope tables (Table **3** and **4**) were all known compounds

**SI-References**

## SI-Experimental

**Preparation of Mg: Al HT 3:1:** Mg:Al HT 3:1 was prepared using three parts  $M^{2+}$  to two parts  $M^{3+}$  titrated together at a pH between 8-10. A standard procedure prepared two solutions. Solution 1 was that of deionized  $H_2O$ ,  $Mg(NO_3)_2 \cdot 6H_2O$  (0.15 mol), and  $Al(NO_3)_3 \cdot 9H_2O$  (0.05 mol). Solution 2 was that of deionized  $H_2O$ , NaOH (0.4 mol), and  $NaCO_3$  (0.025 mol). Solution 1 was then titrated into solution 2 over a three to four hour period while stirring between 800 and 1200 rpm and then heated at 338K for 16-20 hours. The precipitate was then filtered and washed with room temperature deionized water until the pH of the filtrate was between 7 and 7.2. Once filtered the hydrotalcite was dried in an oven at 110°C for 24 hours. The dry hydrotalcite was then resuspended in deionized water, filtered, and dried again in the oven. For the samples that were calcined, they were placed in a furnace at 450°C for 24 hours and cooled in a desiccator before put into sample jars and stored.

**Preparation of 15%  $M^x$  doped Mg:Al Hydrotalcite:**  $M^x$  ( $M = Cu, Fe, Zn, Ni, Cr$ ;  $x = 2^+, 3^+$ ) doped Mg:Al HT was prepared using three parts  $M^{2+}$  to two parts  $M^{3+}$  titrated together at pH>11. A standard procedure prepared three solutions. Solution 1 was that of deionized  $H_2O$ ,  $Mg(NO_3)_2 \cdot 6H_2O$ ,  $Al(NO_3)_3 \cdot 9H_2O$ , and  $M^x(NO_3)_x \cdot YH_2O$ . Solution 2 was that of deionized  $H_2O$  and  $Na_2CO_3$  (0.025 mol). Solution 3 was 1M NaOH. Solution 1 was then titrated into solution 2 over a three to four hour period with aliquots of Solution 3 added regularly. The system was left stirring between 800 and 1200 rpm through the titration and then heated at 338K for 16-20 hours. The precipitate was then filtered and washed with room temperature deionized water until the pH of the filtrate was between 7 and 7.2. Once filtered the hydrotalcite was dried in an oven at 110°C for 24 hours. The dry hydrotalcite was then resuspended in deionized water, filtered, and dried again in the oven. For the samples that were calcined, they were placed in a furnace at 450°C for 24 hours and cooled in a desiccator before put into sample jars and stored.

**Table S1.** Reports of hydrotalcite-like materials and their structural properties

| Reference                                                 | Formula                                     | BET ( $m^2/g$ )    | Crystallite Å              |
|-----------------------------------------------------------|---------------------------------------------|--------------------|----------------------------|
| Millange J. Mater. Chem. 2000, 1713-1720                  | $[Mg_3Al(OH)_8] [(CO_3)_{0.5}] \cdot 2H_2O$ | N/A                | 337                        |
| V.K. Diez et. al J. Catalysis, 2003, 220-233              | $Mg_5AlO_x$                                 | 184                | N/A                        |
|                                                           | $Mg_3AlO_x$                                 | 238                | N/A                        |
|                                                           | $Mg_1AlO_x$                                 | 231                | N/A                        |
| Meloni, D. et. al. J. Therm. Anal. Calorim. 2012, 783-791 | $MgNiAl(0.22)^*$                            | 154                | $a = 3.012$ ; $c = 22.162$ |
|                                                           | $MgNiAl(0.47)^*$                            | 359                | $a = 3.039$ ; $c = 22.046$ |
|                                                           | $MgNiAl(4.05)^*$                            | 282                | $a = 3.051$ ; $c = 22.918$ |
| Zhao, Y. et. al. Chem. Mater. 2002, 4286-4291             | $Mg_2Al^a$                                  | N/A                | 296                        |
|                                                           | $Mg_3Al^a$                                  | N/A                | 116                        |
|                                                           | $Mg_4Al^a$                                  | N/A                | 96                         |
| Sharma, S.K.; et. al. Ind. Eng. Chem. Res.                | $Mg_{3.5}Al$                                | 75-85 <sup>b</sup> | 180-290 <sup>c</sup>       |

|                                                                                        |                                                                                                                   |                                                   |                                                          |
|----------------------------------------------------------------------------------------|-------------------------------------------------------------------------------------------------------------------|---------------------------------------------------|----------------------------------------------------------|
| 2007, 4856-4865                                                                        |                                                                                                                   |                                                   |                                                          |
| Miyata, S. <i>Clays and Clay Miner.</i> 1980, 50-56                                    | MgAl <sup>a,d</sup>                                                                                               | 24                                                | 112-909 <sup>e</sup>                                     |
| Takehira, K. <i>Catal. Surv. Asia.</i> 2007, 1-30                                      | Mg <sub>3</sub> -Al <sup>a</sup><br>Ni <sub>2</sub> -Al <sup>a</sup><br>Mg <sub>2.5</sub> (Ni <sub>0.5</sub> )-Al | 91.3<br>99.9<br>121.2                             | N/A<br>N/A<br>N/A                                        |
| Wu, J.S; et. al. <i>Turk. J. Chem.</i> <b>2011</b> , 881-891                           | Cu-Mg-Al-HTlc<br>1) 0% ethylene glycol<br>2) 5%<br>3) 10%<br>4) 15%<br>5) 20%                                     | 1) N/A<br>2) N/A<br>3) 136.92<br>4) N/A<br>5) N/A | 1) 382.5<br>2) 364.5<br>3) 321.4<br>4) 338.7<br>5) 339.6 |
| Tong, M.; Chen, H.; Yang, Z.; Wen, R. <i>Int. J. Mol. Sci.</i> <b>2011</b> , 1756-1766 | Zn-Al-Hts                                                                                                         | 43.48                                             | N/A                                                      |

\* = () indicate ratio of Mg<sup>2+</sup>/Ni<sup>2+</sup>

<sup>a</sup> belong to general formula of  $[M^{(II)}_{1-x}M^{(III)}_x(OH)_2]^{x+}(A^{n-}_{x/n})_mH_2O$  (typically  $[Mg_{1-x}Al_x(OH)_2]^{x+}(CO_3)_{x/2} \cdot yH_2O$  made via constant pH method)

<sup>b</sup> depending on aging time (75-7hr : 85-3hr)

<sup>c</sup> depending on hydrothermal treatment temp (aging temp), where 70°C = 180 and 140°C = 290

<sup>d</sup> ratio = Al/(Mg+Al) = 0.250

<sup>e</sup> depending on hydrothermal treatment temp/time (112 = 0 hr at 40°C and 909 = 48hr at 150°C)

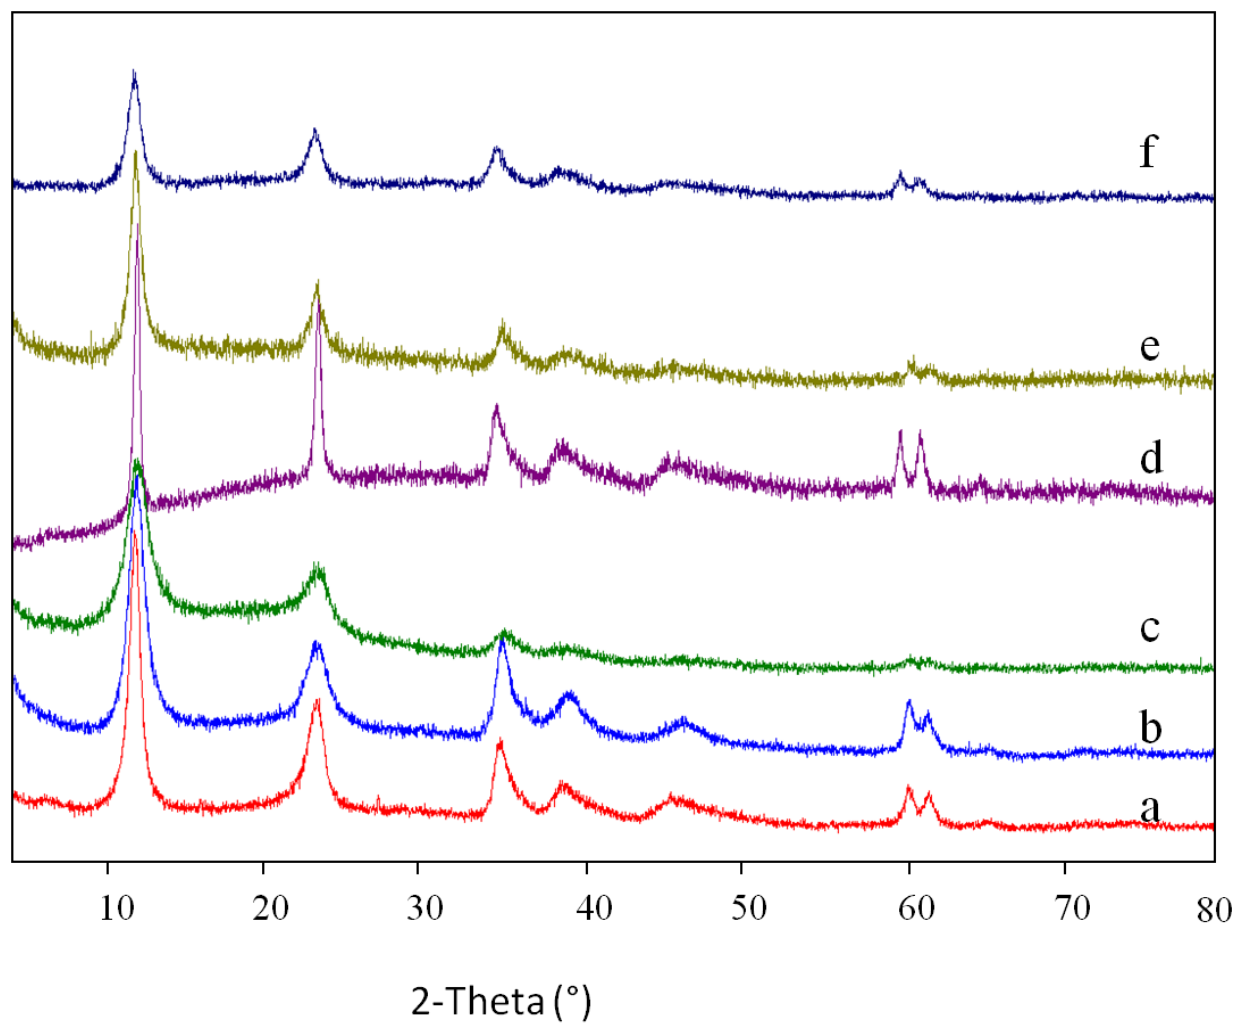

**Figure S1:** PXRD patterns of (a) HT1, (b) HT2, (c) HT3, (d) HT4, (e) HT5, (f) HT6

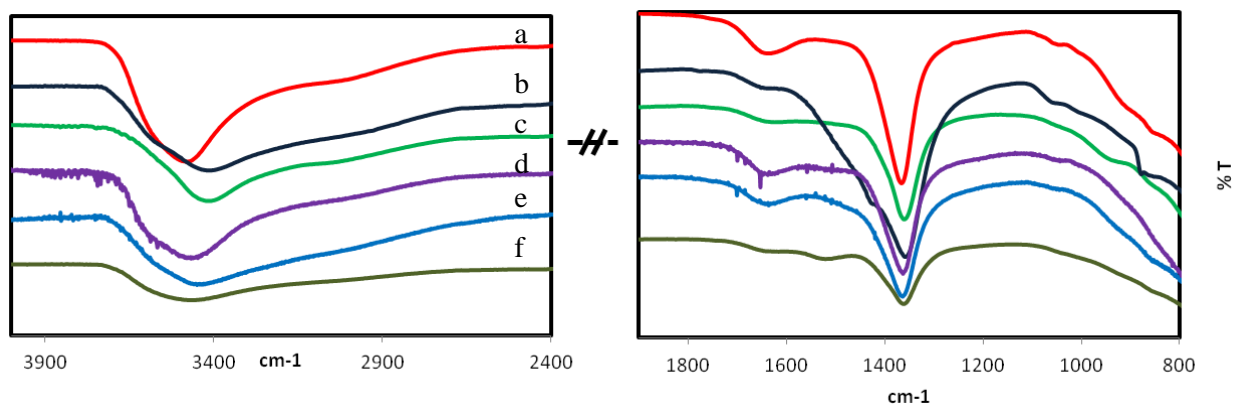

**Figure S2:** FT-IR spectra of (a) HT1, (b) HT6, (c) HT3, (d) HT4, (e) HT2, (f) HT5

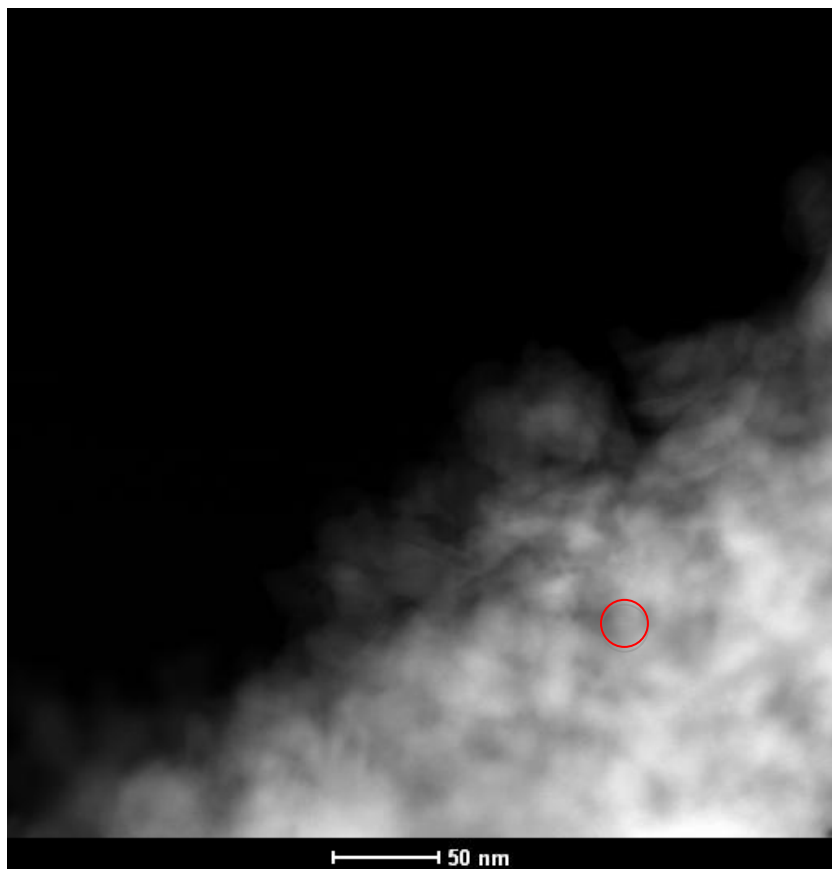

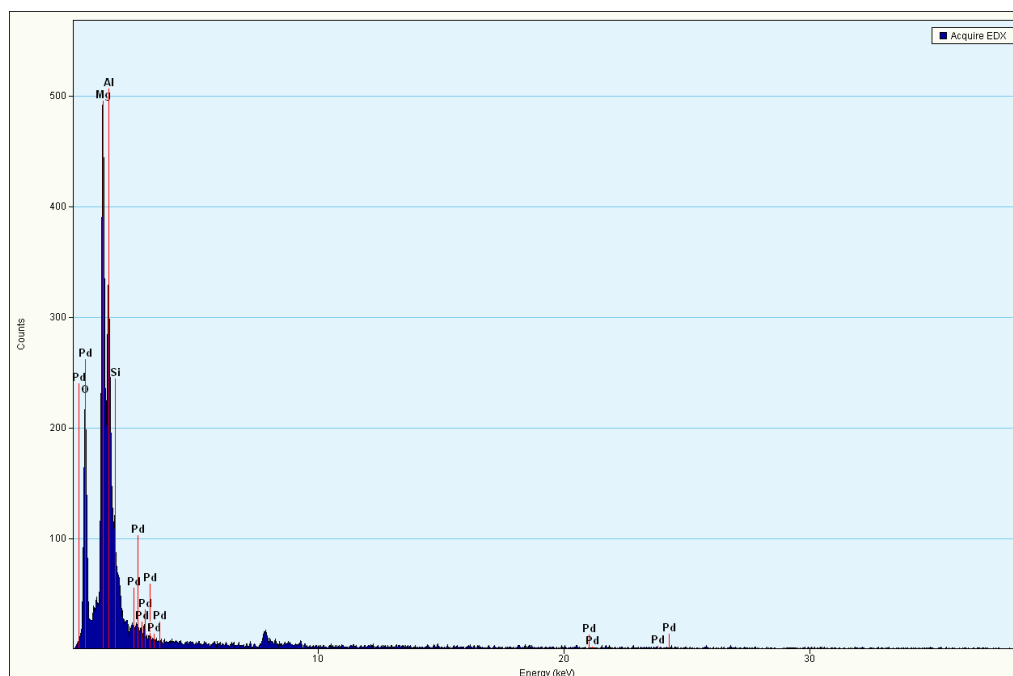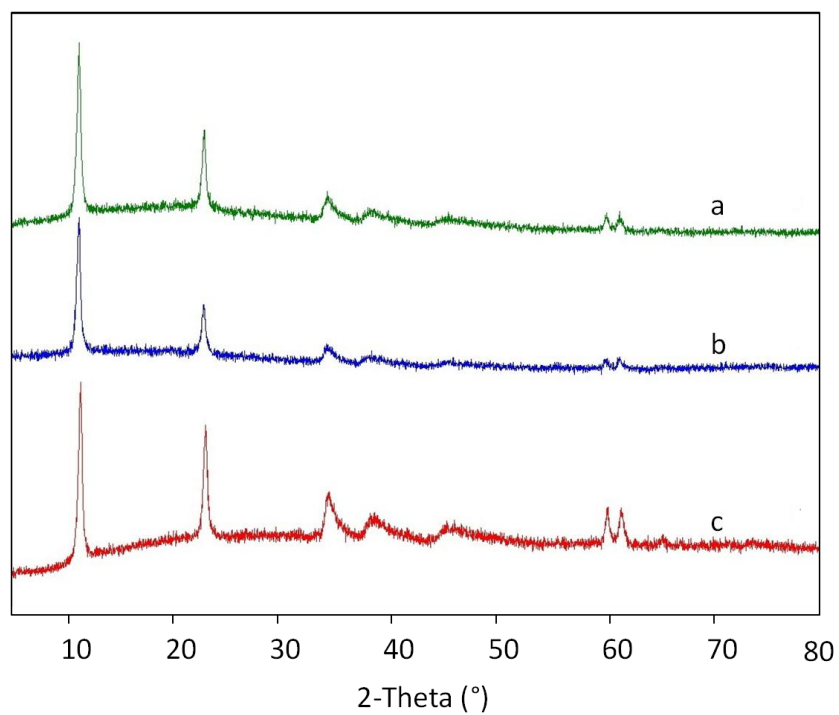

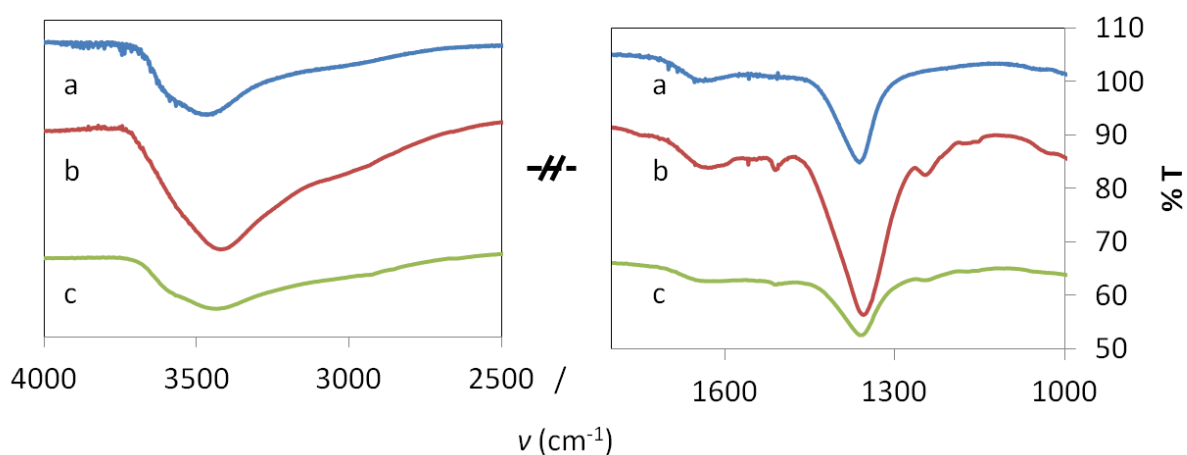

**Figure S5:** FT-IR spectra of (a) HT4, (b) HT4 washed and dried after 1 cycle of the coupling reaction between benzyl alcohol and p-anisidine and (c) HT4 washed and dried after cycle 2

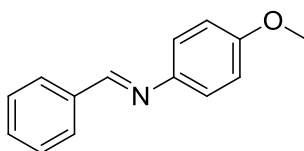

**4-methoxy-N-(phenylmethylene)benzenamine.**  $^1\text{H}$  NMR ( $\text{CDCl}_3$ , 400 MHz):  $\delta$  8.48 (s, 1H), 7.89 (m, 2H), 7.46 (m, 3H), 7.25 (d, 2H), 6.95 (d, 2H), 3.83 (s, 3H).  $^1\text{H}$  NMR is consistent with spectra reported by Lan, Y.-S..<sup>1</sup>

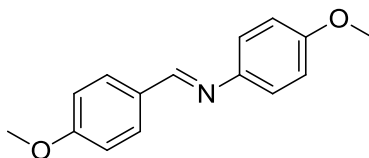

**4-methoxy-N-[(4-methoxyphenyl)methylene]-benzenamine.**  $^1\text{H}$  NMR ( $\text{CDCl}_3$ , 400 MHz):  $\delta$  8.40 (s, 1H), 7.82 (d, 2H), 7.19 (d, 2H), 6.96 (m, 4H), 3.86 (s, 3H), 3.82 (s, 3H).  $^1\text{H}$  NMR is consistent with spectra reported by Bennett, J.S..<sup>2</sup>

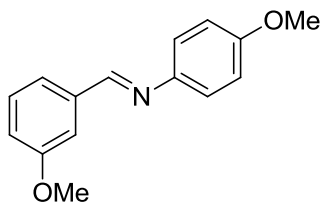

**4-methoxy-N-[(3-methoxyphenyl)methylene]-benzenamine.**  $^1\text{H}$  NMR ( $\text{CDCl}_3$ , 400 MHz):  $\delta$  8.44 (s, 1H), 7.51 (s, 1H), 7.39 (m, 2H), 7.22 (d, 2H), 7.03 (d, 1H), 6.94 (2, 2H), 3.88 (s, 3H), 3.82 (s, 3H).  $^1\text{H}$  NMR is consistent with spectra reported by Cainelli, G.<sup>3</sup>

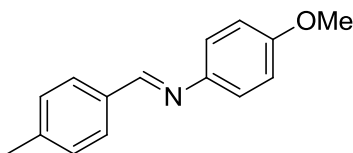

**4-methoxy-N-[(4-methylphenyl)methylene]- Benzenamine.**  $^1\text{H}$  NMR ( $\text{CDCl}_3$ , 400 MHz):  $\delta$  8.43 (s, 1H), 7.77 (d, 2H), 7.23 (m, 4H), 6.93 (d, 2H), 3.82 (s, 3H), 3.67 (s, 3H).  $^1\text{H}$  NMR is consistent with spectra reported by Gopalakrishnan, M.<sup>4</sup>

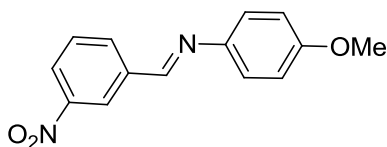

**4-methoxy-N-[(3-nitrophenyl)methylene]- Benzenamine.**  $^1\text{H}$  NMR ( $\text{CDCl}_3$ , 400 MHz):  $\delta$  8.63 (s, 1H), 8.47 (s, 1H), 8.19 (d, 1H), 8.12 (d, 1H), 7.54 (t, 1H), 7.20 (d, 2H), 6.89 (d, 2H), 3.76 (s, 3H).  $^1\text{H}$  NMR is consistent with spectra reported by Cao, C.<sup>5</sup>

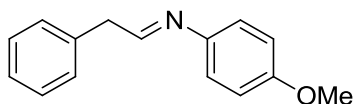



**4-methoxy-*N*-(2-phenylethylidene)- Benzenamine.**  $^1\text{H}$  NMR ( $\text{CDCl}_3$ , 400 MHz):  $\delta$  8.32 (t, 1H), 7.59 (m, 2H), 7.47 (m, 3H), 6.97 (d, 2H), 6.85 (d, 2H), 3.81 (s, 3H), 3.52 (d, 2H).  $^1\text{H}$  NMR is consistent with spectra reported by Tomioka, K.<sup>6</sup>

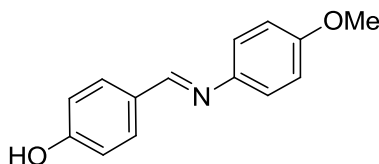

**[[4-methoxyphenyl]imino]methyl]-Phenol.**  $^1\text{H}$  NMR ( $\text{CDCl}_3$ , 400 MHz):  $\delta$  8.34 (s, 1H), 7.71 (d, 2H), 7.28 (d, 2H), 6.91 (d, 2H), 6.42 (d, 2H), 3.78 (s, 3H).  $^1\text{H}$  NMR is consistent with spectra reported by Chen, L-X.<sup>7</sup>

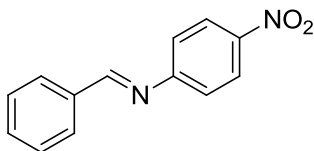

**4-nitro-*N*-(phenylmethylene)-Benzenamine.** NMR ( $\text{CDCl}_3$ , 400 MHz):  $\delta$  8.38 (s, 1H), 8.26 (d, 2H), 8.03 (d, 2H), 7.9 (dd, 2H), 7.51 (m, 3H).  $^1\text{H}$  NMR is consistent with spectra reported by Naeimi, H.<sup>8</sup>

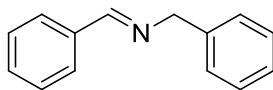

***N*-(phenylmethylene)- Benzenemethanamine.** NMR ( $\text{CDCl}_3$ , 400 MHz):  $\delta$  8.27 (s, 1H), 7.65 (m, 2H), 7.5-7.1 (m, 8H), 3.76 (s, 2H).  $^1\text{H}$  NMR is consistent with spectra reported by Esteruelas, M.A.<sup>9</sup>

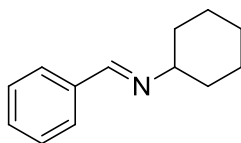

***N*-(phenylmethylene)-Cyclohexanamine.** NMR ( $\text{CDCl}_3$ , 400 MHz):  $\delta$  8.13 (s, 1H), 7.71 (m, 2H), 6.98 (m, 3H), 3.11 (m, 1H), 1.82-1.63 (m, 10H).  $^1\text{H}$  NMR is consistent with spectra reported by Esteruelas, M.A.<sup>9</sup>

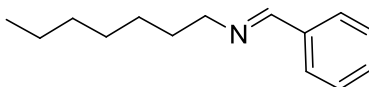

**N-(phenylmethylene)-1-Heptanamine.** NMR (CDCl<sub>3</sub>, 400 MHz):  $\delta$  8.32 (s, 1H), 7.79 (m, 2H), 7.46 (m, 3H), 3.67 (m, 2H), 1.77 (m, 2H), 1.37 (m, 8H), 0.96 (m, 3.29). <sup>1</sup>H NMR is consistent with spectra reported by Liu, L. H.<sup>10</sup>

## SI-References:

1. Lan, Y.-S.; Liao, B.-S.; Liu, Y.-H.; Peng, S.-M.; Liu, S.-T., **2013**, - 2013 (- 23), - 5164.
2. Bennett, J. S.; Charles, K. L.; Miner, M. R.; Heuberger, C. F.; Spina, E. J.; Bartels, M. F.; Foreman, T., *Green Chemistry* **2009**, 11 (2), 166-168.
3. Cainelli, G.; Panunzio, M.; Giacomini, D.; Disimone, B.; Camerini, R., *Synthesis* **1994**, (8), 805-808.
4. Gopalakrishnan, M.; Sureshkumar, P.; Kanagarajan, V.; Thanusu, J., *Research on Chemical Intermediates* **2007**, 33 (6), 541-548.
5. Cao, C. Z.; Lu, B. T.; Chen, G. F., *Journal of Physical Organic Chemistry* **2011**, 24 (4), 335-341.
6. Tomioka, K.; Satoh, M.; Taniyama, D.; Kanai, M.; Iida, A., *Heterocycles* **1998**, 47 (1), 77-80.
7. Cheng, L. X.; Tang, J. J.; Luo, H.; Jin, X. L.; Dai, F.; Yang, J.; Qian, Y. P.; Li, X. Z.; Zhou, B., *Bioorganic & Medicinal Chemistry Letters* **2010**, 20 (8), 2417-2420.
8. Naeimi, H.; Salimi, F.; Rabiei, K., *Journal of Molecular Catalysis a-Chemical* **2006**, 260 (1-2), 100-104.
9. Esteruelas, M. A.; Honczek, N.; Olivan, M.; Onate, E.; Valencia, M., *Organometallics* **2011**, 30 (9), 2468-2471.
10. Liu, L. H.; Zhang, S. Y.; Fu, X. F.; Yan, C. H., *Chemical Communications* **2011**, 47 (36), 10148-10150.
